# Supplementary material
Source: publisher figshare collection journal article supplement (https://springernature.figshare.com/ndownloader/files/20990151)
Supplement: Supplementary file [file 20990151]

**Point Prevalence Survey of Antimicrobial Use and Healthcare-Associated Infections in Belgian Acute Care Hospitals: Results of the Global-PPS and ECDC-PPS 2017**

ADDITIONAL FILE 3

**Table S3: Description of diagnosis sites of the antimicrobial prescriptions per indication, total results for Global and ECDC-PPS 2017 (Belgium, acute care hospitals)**

| Diagnosis site                                       | Number of prescriptions (% all diagnosis sites) |              |             |             |                    |                    |
|------------------------------------------------------|-------------------------------------------------|--------------|-------------|-------------|--------------------|--------------------|
|                                                      | Total                                           | CAI          | HAI         | LAI         | MP*                | SP*                |
| <b>All diagnosis sites</b>                           | <b>9232</b>                                     | <b>4775</b>  | <b>2333</b> | <b>248</b>  | <b>545</b>         | <b>1038</b>        |
| Central Nervous System infections (CNS)              | 147 (1.6%)                                      | 82 (1.7%)    | 35 (1.5%)   | 0           | 4 (0.7%)           | 26 (2.5%)          |
| Cardiovascular System infections (CVS)               | 193 (2.1%)                                      | 102 (2.1%)   | 60 (2.8%)   | 0           | 1 (0.2%)           | 27 (2.6%)          |
| Ear, Nose, Throat infections (ENT)                   | 215 (2.3%)                                      | 140 (2.9%)   | 44 (1.9%)   | 4 (1.6%)    | 7 (1.3%)           | 19 (1.8%)          |
| Eye infections (EYE)                                 | 7 (0.08%)                                       | 6 (0.1%)     | 0           | 0           | 0                  | 1 (0.1%)           |
| Gastro-Intestinal tract infections (GI)              | 1176 (12.7%)                                    | 733 (15.4%)  | 351 (15.1%) | 18 (7.3%)   | 8 (1.5%)           | 65 (6.3%)          |
| Obstetric/ Gynaecological infections (GUOB)          | 109 (1.2%)                                      | 65 (1.4%)    | 19 (0.8%)   | 0           | 8 (1.5%)           | 14 (1.3%)          |
| Respiratory infections (RESP)                        | 2365 (25.6%)                                    | 1576 (33.0%) | 606 (26.0%) | 110 (44.4%) | 59 (10.8%)         | 8 (0.8%)           |
| Skin and soft Tissue + Bone/joint infections (SSTBJ) | 1539 (16.7%)                                    | 844 (17.7%)  | 400 (17.2%) | 29 (11.7%)  | 4 (0.7%)           | 257 (24.8%)        |
| Urinary Tract infections (UTI)                       | 1232 (13.3%)                                    | 685 (14.4%)  | 373 (16.0%) | 70 (28.2%)  | 37 (6.8%)          | 66 (6.4%)          |
| Neonatal                                             | 23 (0.2%)                                       | 7 (0.1%)     | 0           | 0           | 15 (2.8%)          | 0                  |
| No defined site                                      | 2226 (24.1%)                                    | 535 (11.2%)  | 445 (19.1%) | 17 (6.9%)   | 146 (26.8%)        | 2 (0.2%)           |
| <i>Missing data</i>                                  |                                                 |              |             |             | <i>256 (47.0%)</i> | <i>553 (53.3%)</i> |

CAI = community-acquired infections, ECDC = European Centre for Disease Prevention and Control, HAI = healthcare-associated infections, LAI = Infection present on admission from long-term care facility or Nursing Home, MP = medical prophylaxis, SP = surgical prophylaxis

\* Diagnosis sites for prophylaxis only registered in the Global-PPS
